# Supplementary material
Source: publisher figshare collection journal article supplement (https://acs.figshare.com/ndownloader/files/26351286)
Supplement: Supplementary file 1 [file 26351286]

## Supporting Information

### Structural and biochemical insights into the inhibition of human acetylcholinesterase by G-series nerve agents and subsequent reactivation by HI-6

*Jack R. McGuire<sup>†</sup>, Stephanie M. Bester<sup>†</sup>, Mark A. Guelta<sup>‡</sup>, Jonah Cheung<sup>§</sup>,  
Caroline Langley<sup>†</sup>, Mark D. Winemiller<sup>‡</sup>, Sue Y. Bae<sup>‡</sup>, Vanessa Funk<sup>‡</sup>, James M.  
Myslinski<sup>‡</sup>, Scott D. Pegant<sup>†</sup>, |, \* and  
Jude J. Height<sup>‡</sup> \**

<sup>†</sup> Department of Pharmaceutical and Biomedical Sciences, University of Georgia, Athens, Georgia 30602, United States of America.

<sup>‡</sup> U.S. Army Edgewood Chemical Biological Center, Aberdeen Proving Ground, MD 21010-5424, USA.

<sup>§</sup> New York Structural Biology Center, New York, New York, United States of America

| U.S. Army Medical Research Institute of Chemical Defense, 2900 Ricketts Point Road, Aberdeen Proving Ground, MD 21010-5400

## Table of Contents

Page S2: Supplementary Figure 1

Page S5: Supplementary Figure 2

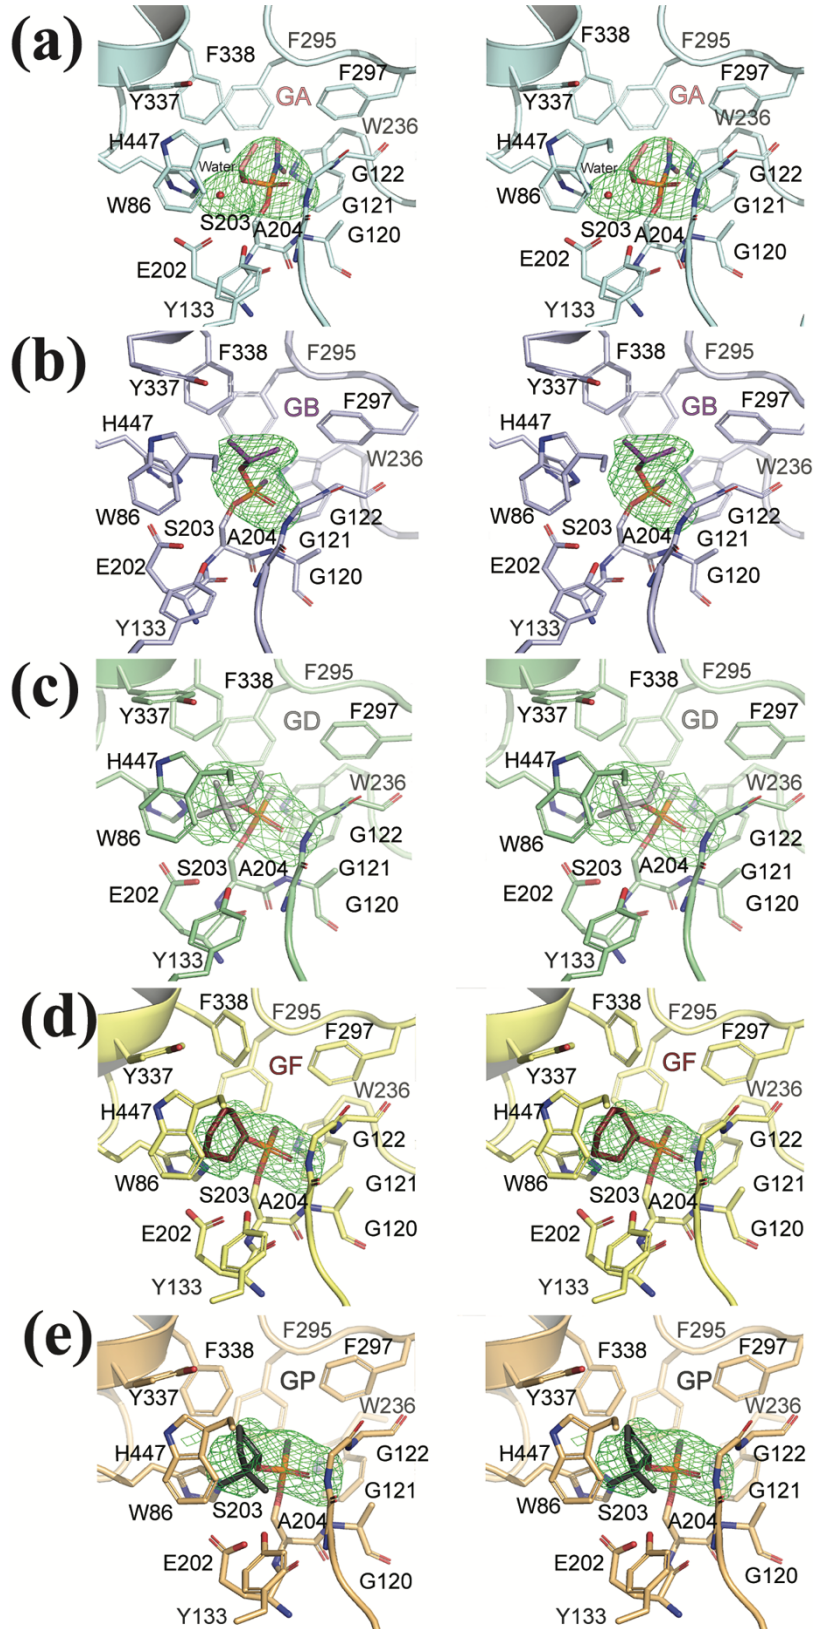

**Figure S1.** Crystal structures of Human Acetylcholinesterase in complex with G-series nerve agent. (a) Wall-eyed stereoview of GA (salmon) bound to the active site of hAChE (pale cyan) with hAChE  $F_o - F_c$  density scaled to  $3\sigma$  (green mesh). (b) Wall-eyed stereoview of GB (dark violet) bound to the active site of hAChE (blue-grey) with hAChE  $F_o - F_c$  density scaled to  $3\sigma$  (green mesh). (c) Wall-eyed stereoview of GD (silver) bound to the active site of hAChE (wheat) with hAChE  $F_o - F_c$  density scaled to  $3\sigma$  (green mesh). (d) Wall-eyed stereoview of GF (dark red) bound to the active site of hAChE (light yellow) with hAChE  $F_o - F_c$  density scaled to  $3\sigma$  (green mesh). (e) Wall-eyed stereoview of GP (dark grey) bound to the active site of hAChE (light orange) with hAChE  $F_o - F_c$  density scaled to  $3\sigma$  (green mesh).

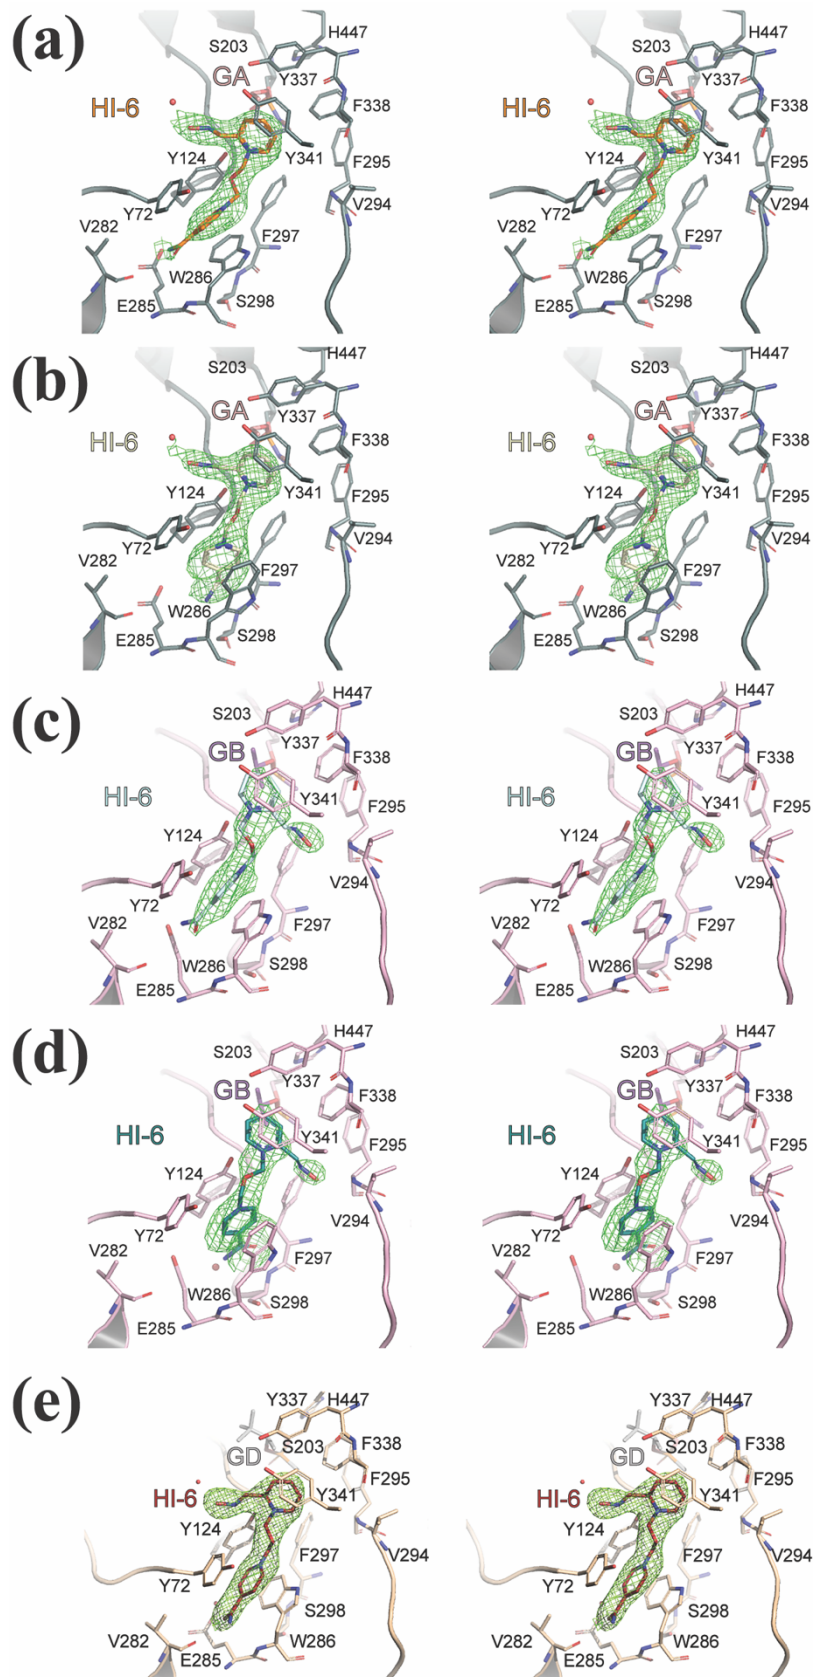

**Figure S2.** Crystal structures of HI-6 bound in the active site of hAChE. (a-b) Wall-eyed stereoview of the active site of hAChE (grey-green) bound to two conformations of HI-6 (orange and pale yellow).  $F_o - F_c$  density scaled to  $3\sigma$  (green mesh). (c-d) Wall-eyed stereoview of the active site of hAChE (light pink) bound to two conformations of HI-6 (light teal and dark teal).  $F_o - F_c$  density scaled to  $3\sigma$  (green mesh). (e) Wall-eyed stereoview of the active site of hAChE (wheat) bound to HI-6 (dark red).  $F_o - F_c$  density scaled to  $3\sigma$  (green mesh). Waters are shown as red spheres.
